# Supplementary material for: MnO2-mineralized milk exosomes as a novel nanoplatform for glutathione detection
Source: Royal Society of Chemistry journal article supplement (doi:10.1039/d4tb01662a), 2024-11-01

## **MnO<sub>2</sub>-Mineralized Milk Exosomes as a Novel Nanoplatfom for Glutathione Detection**

Xudong Wang, Xue Wu, Jiuheng Shen, Xian Zhao, Peifen Gao, Wantong Zhou,  
Wenlin An\*

National Vaccine & Serum Institute (NVSI), China National Biotech Group (CNBG),  
Sinopharm Group, No. 38 Jing Hai Second Road, Beijing 101111, China

### **Correspondence:**

Wenlin An, Email: [anwenlin@sinopharm.com](mailto:anwenlin@sinopharm.com)

**Table S1 Curcumin encapsulating efficiency**

| mEV (particles)      | Curcumin ( $\mu\text{g}$ ) | Encapsulating Efficiency | Curcumin molecules/mEVs |
|----------------------|----------------------------|--------------------------|-------------------------|
| $3.0 \times 10^{11}$ | 25                         | 93.0%                    | $7.59 \times 10^5$      |
| $3.0 \times 10^{11}$ | 62.5                       | 82.2%                    | $1.68 \times 10^6$      |
| $3.0 \times 10^{11}$ | 125                        | 30.8%                    | $1.26 \times 10^6$      |
| $3.0 \times 10^{11}$ | 250                        | 18.1%                    | $1.47 \times 10^6$      |

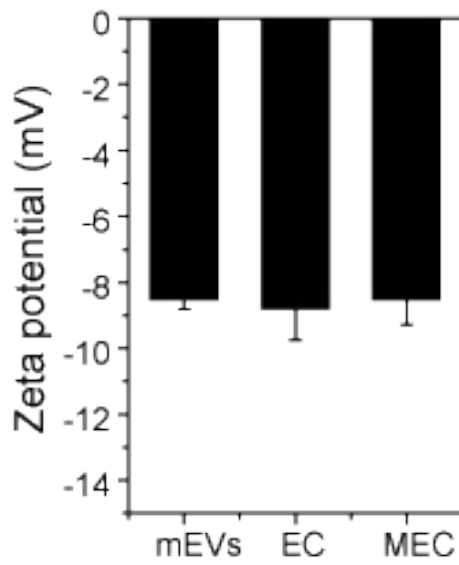

**Figure S1.** Zeta potential of mEV, EC and MEC.

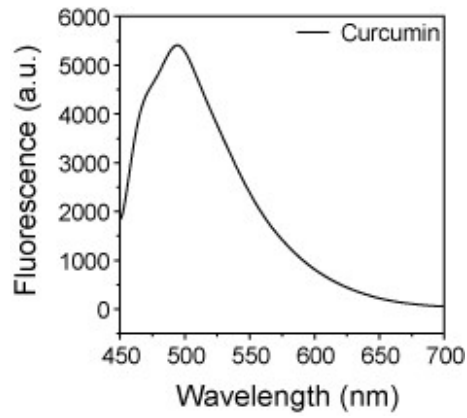

**Figure S2.** Fluorescence emission spectra of curcumin in water.

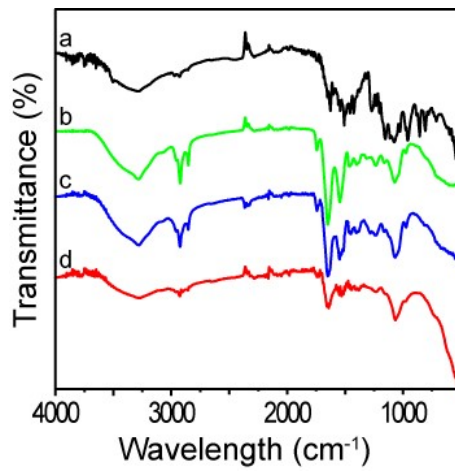

**Figure S3.** FT-IR spectra of curcumin (curve a), mEV (curve b), mEV-curcumin (curve c) and MnO<sub>2</sub>@mEV-curcumin (curve d).

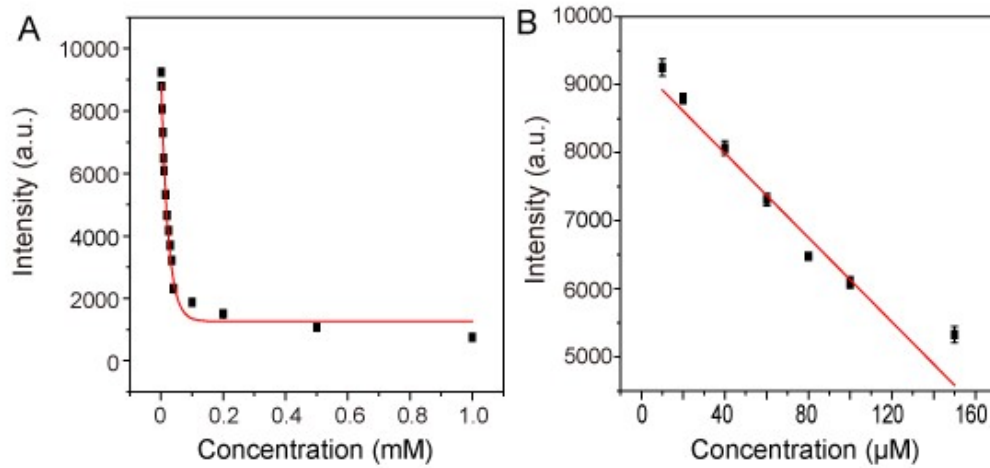

**Figure S4.** (A) Relationship between fluorescence decrease and  $\text{KMnO}_4$  concentration. (B) Calibration curves between relative fluorescence intensity of mEV-curcumin and  $\text{KMnO}_4$  concentration.

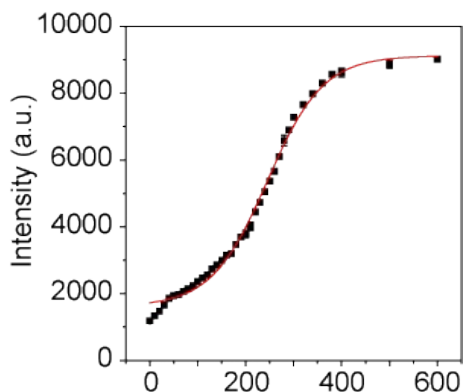

**Figure S5.** Relationship between fluorescence decrease and GSH concentration.

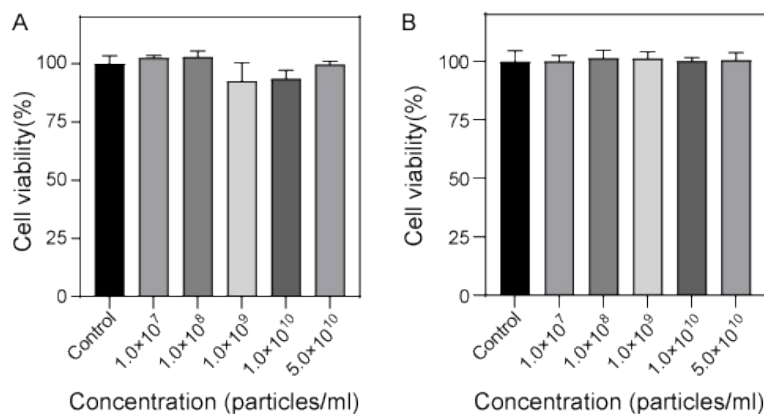

**Figure S6.** The cytotoxicity of  $\text{MnO}_2@m\text{EV-curcumin}$  was tested with HeLa cells and NIH3T3 cells by CCK-8 assay. HeLa cells and NIH3T3 cells were incubated with  $\text{MnO}_2@m\text{EV-curcumin}$  of different concentration ( $1.0 \times 10^7$ ,  $1.0 \times 10^8$ ,  $1.0 \times 10^9$ ,  $1.0 \times 10^{10}$ ,  $5.0 \times 10^{10}$ ) for 48h.

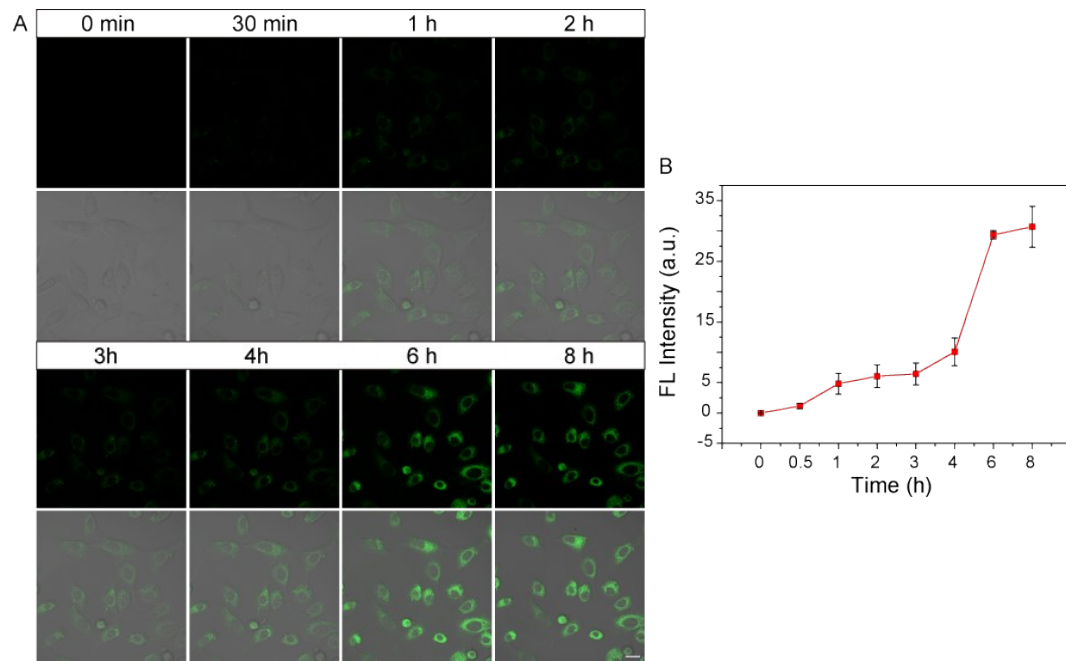

Supplement: d4tb01662a1.pdf [file d4tb01662a1.pdf]
